# Supplementary material
Source: PubMed Central journal article supplement (PMC3619153)
Supplement: Supp_Data.pdf [file Supp_Data.pdf]

## Supplementary Information

### **Efficient protection and transfection of siRNA by cationic shell-crosslinked knedel-like nanoparticles (cSCKs)**

Yuefei Shen,<sup>1</sup> Huafeng Fang,<sup>1</sup> Ke Zhang,<sup>1</sup> Ritu Shrestha,<sup>1,2</sup> Karen L. Wooley,<sup>\*1,2</sup> and John-Stephen A. Taylor<sup>\* 1</sup>

<sup>1</sup> Department of Chemistry, Washington University, One Brookings Drive, St. Louis, Missouri 63130 USA

<sup>2</sup> Departments of Chemistry and Chemical Engineering, Texas A&M University, P.O. Box 30012, College Station, TX 77842-3012 USA

| Contents                                                                                                                                                          | Page |
|-------------------------------------------------------------------------------------------------------------------------------------------------------------------|------|
| Table S1. LC <sub>50</sub> for PAEA <sub>128</sub> - <i>b</i> -PS <sub>40</sub> cSCKs, cM and Lipofectamine 2000 with control and lethal siRNAs.                  | S3   |
| Table S2. LC <sub>50</sub> for (PAEA <sub>160</sub> - <i>b</i> -PS <sub>30</sub> ) cSCKs, cM and Lipofectamine 2000 with control and lethal siRNAs in HeLa cells. | S4   |
| Figure S1. Cytotoxicity assay for siRNA silencing efficiency in different mammalian cell lines.                                                                   | S5   |
| Figure S2. Silencing efficiency of siRNA mediated knockdown of iNOS mRNA by PAEA <sub>128</sub> - <i>b</i> -PS <sub>40</sub> cSCK-pa100 in RAW264.7 cells.        | S6   |

|                                                                                                                                                                               |     |
|-------------------------------------------------------------------------------------------------------------------------------------------------------------------------------|-----|
| Figure S3. Electromobility shift assay of siRNA and GALA binding to PAEA <sub>160</sub> -b-PS <sub>30</sub> cSCK.                                                             | S7  |
| Figure S4. Cellular uptake of PAEA <sub>160</sub> -b-PS <sub>30</sub> cSCK(Alexa488)-siRNA(Cy5)- GALA nanocomplexes in RAW264.7 cell line by flow cytometry analysis.         | S8  |
| Figure S5. Representative confocal fluorescent microscopic image of intracellular localization of cSCK•siRNA•GALA nanocomplexes in RAW 264.7 cell line.                       | S9  |
| Figure S6. Inhibition of cSCK uptake and cytotoxicity of endocytosis inhibitors.                                                                                              | S10 |
| Figure S7. Representative confocal fluorescent microscopic image of intracellular localization of cSCK•siRNA•GALA nanocomplexes with Lysotracker-Blue in RAW 264.7 cell line. | S11 |
| Figure S8. Representative confocal fluorescent microscopic image of intracellular localization of cSCK•siRNA•GALA nanocomplexes with Dextran in RAW 264.7 cell line.          | S11 |

---

Tables

Table S1. LC<sub>50</sub> for PAEA<sub>128</sub>-*b*-PS<sub>40</sub> cSCKs, cM and Lipofectamine 2000 with control and lethal siRNAs.

| Transfection agent                      | LC50 control<br>siRNA (μg/mL) | Hill slope<br>coefficient | LC50 lethal<br>siRNA (μg/mL) | Hill slope<br>coefficient |
|-----------------------------------------|-------------------------------|---------------------------|------------------------------|---------------------------|
| cSCK-pa <sub>100</sub>                  | 11.1 ± 0.1                    | 6.3 ± 0.2                 | 3.4 ± 0.1                    | 5.2 ± 0.5                 |
| cSCK-pa <sub>75</sub> ta <sub>25</sub>  | 13.4 ± 0.6                    | 3.4 ± 0.5                 | 5.5 ± 0.2                    | 5.4 ± 0.5                 |
| cSCK- pa <sub>50</sub> ta <sub>50</sub> | 22.4 ± 1.5                    | 1.8 ± 0.3                 | 8.3 ± 0.6                    | 2.6 ± 0.4                 |
| cSCK- pa <sub>25</sub> ta <sub>75</sub> | 30.6 ± 1.3                    | 2.6 ± 0.4                 | 12.2 ± 0.7                   | 2.7 ± 0.3                 |
| cM-ta <sub>100</sub>                    | 39.1 ± 1.9                    | 1.9 ± 0.2                 | 21.5 ± 1.0                   | 3.1 ± 0.5                 |
| Lipofectamine 2000                      | 11.1 ± 0.3                    | 2.7 ± 0.2                 | 4.1 ± 0.5                    | 1.8 ± 0.4                 |

Table S2. LC<sub>50</sub> for (PAEA<sub>160</sub>-b-PS<sub>30</sub>) cSCKs, cM and Lipofectamine 2000 with control and lethal siRNAs in HeLa cells.

|         |                       | LC50 control<br>siRNA (µg/ml) | Hill slope<br>coefficient | LC50 lethal<br>siRNA<br>(µg/ml) | Hill slope<br>coefficient |
|---------|-----------------------|-------------------------------|---------------------------|---------------------------------|---------------------------|
| HeLa    | cSCK                  | 16.9 ± 0.8                    | 3.2 ± 0.8                 | 3.9 ± 0.2                       | 2.6 ± 0.3                 |
| 293T    | cSCK                  | 23.6 ± 2.3                    | 2.3 ± 0.2                 | 7.5 ± 0.8                       | 1.3 ± 0.2                 |
|         | Lipofectamine<br>2000 | 10.6 ± 0.5                    | 1.2 ± 0.1                 | 3.2 ± 0.7                       | 0.7 ± 0.1                 |
| HEK     | cSCK                  | 10.2 ± 0.3                    | 3.3 ± 0.3                 | 6.2 ± 0.2                       | 2.4 ± 0.2                 |
|         | Lipofectamine<br>2000 | 7.4 ± 0.3                     | 3.1 ± 0.4                 | 5.0 ± 0.3                       | 2.2 ± 0.2                 |
| BEAS-2B | cSCK                  | 13.6 ± 2.3                    | 1.4 ± 0.4                 | 7.2 ± 1.6                       | 0.9 ± 0.2                 |
|         | Lipofectamine<br>2000 | 6.0 ± 0.7                     | 0.6 ± 0.1                 | 1.2 ± 0.6                       | 0.6 ± 0.2                 |
| MCF-10A | cSCK                  | 13.8 ± 0.6                    | 5.5 ± 1.1                 | 12.1 ± 0.3                      | 4.6 ± 0.5                 |
|         | Lipofectamine<br>2000 | 5.7 ± 0.2                     | 1.9 ± 0.1                 | 3.7 ± 0.3                       | 1.6 ± 0.2                 |

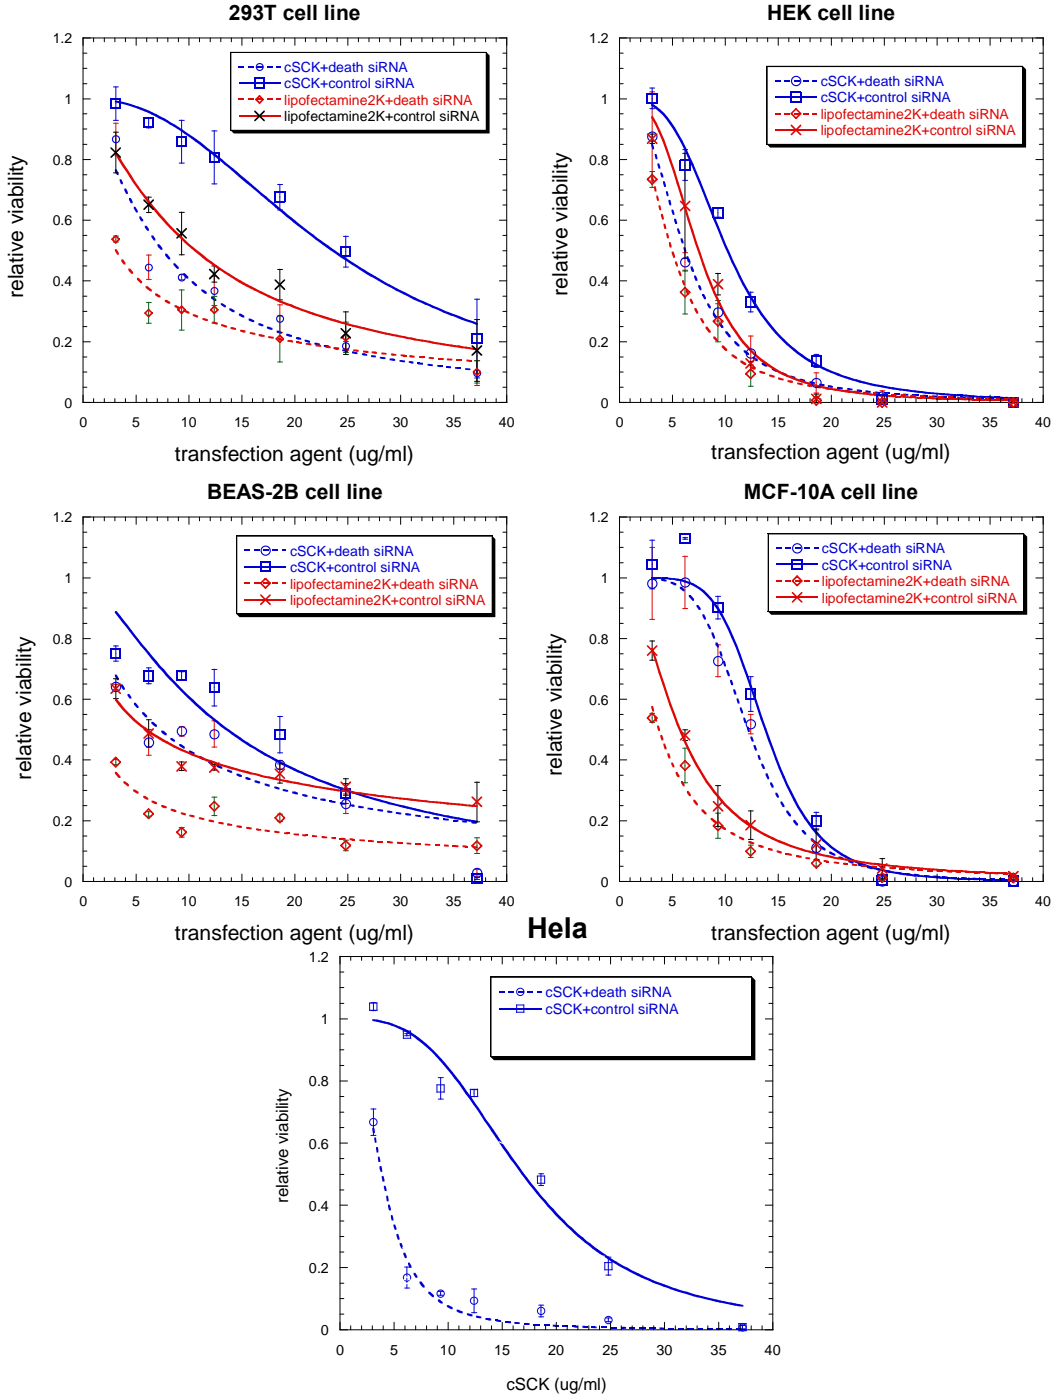

Figure S1. Cytotoxicity assay for siRNA silencing efficiency in different mammalian cell lines. Cells were transfected with 100 nM AllStars Hs Cell Death Control siRNA or ALLStars Negative Control siRNA in the presence of for (PAAE<sub>160</sub>-b-PS<sub>30</sub>) cSCK at different N/P ratios, or Lipofectamine 2000 at the same  $\mu\text{g/ml}$  as for cSCK-pa<sub>100</sub>. After 48 h, the relative cell viability was quantified using CellTiter-Glo<sup>®</sup> Luminescent Cell Viability Assay. The concentration of the cSCKs for N/P=1 was: cSCK-pa<sub>100</sub> 0.62  $\mu\text{g/ml}$ .

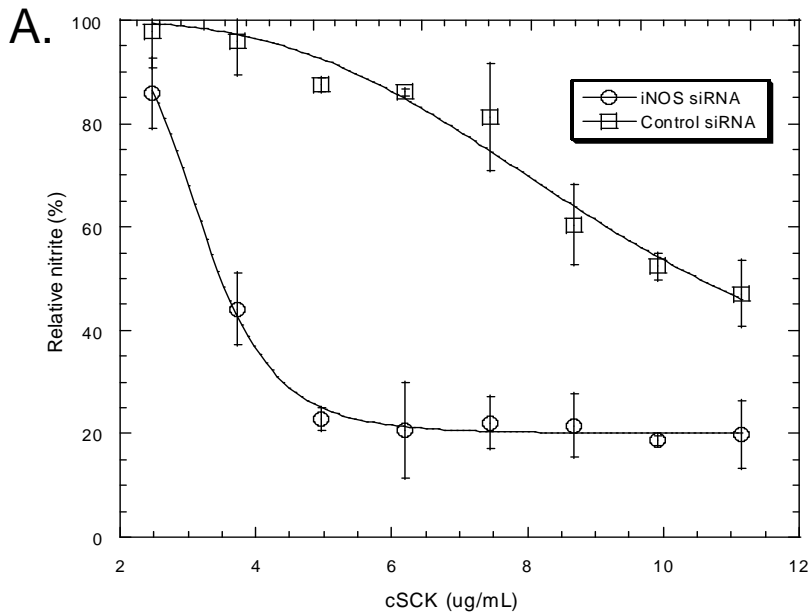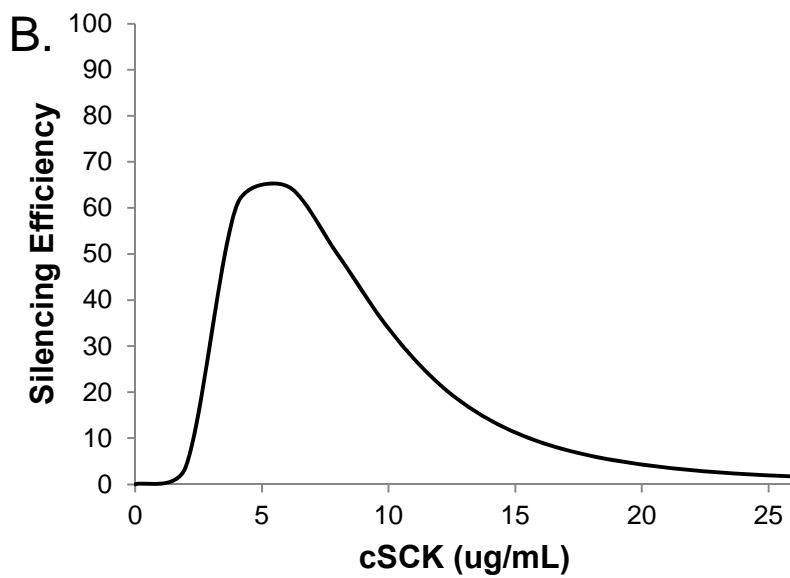

Figure S2. Silencing efficiency of siRNA mediated knockdown of iNOS mRNA by PAEA<sub>128-b</sub>-PS<sub>40</sub> cSCK-pa100 in RAW264.7 cells. A) Curve fits for the taken from Figure 6A with a modified Hill equation to take into account plateauing of the inhibition curve at 20% relative nitrite ( $80/(1+[cSCK]/IC50)^{Hill} + 20$ ), to give LC<sub>50</sub> and Hill coefficients of  $3.8 \pm 0.4$  and  $2.1 \pm 0.5$  for knockdown by the iNOS siRNA, and  $10.5 \pm 0.3$  and  $3.2 \pm 0.4$  for non-specific knockdown, presumably cell death, by the control siRNA. B) Silencing efficiency plot, with 58% maximum efficiency at 6 ug/mL.

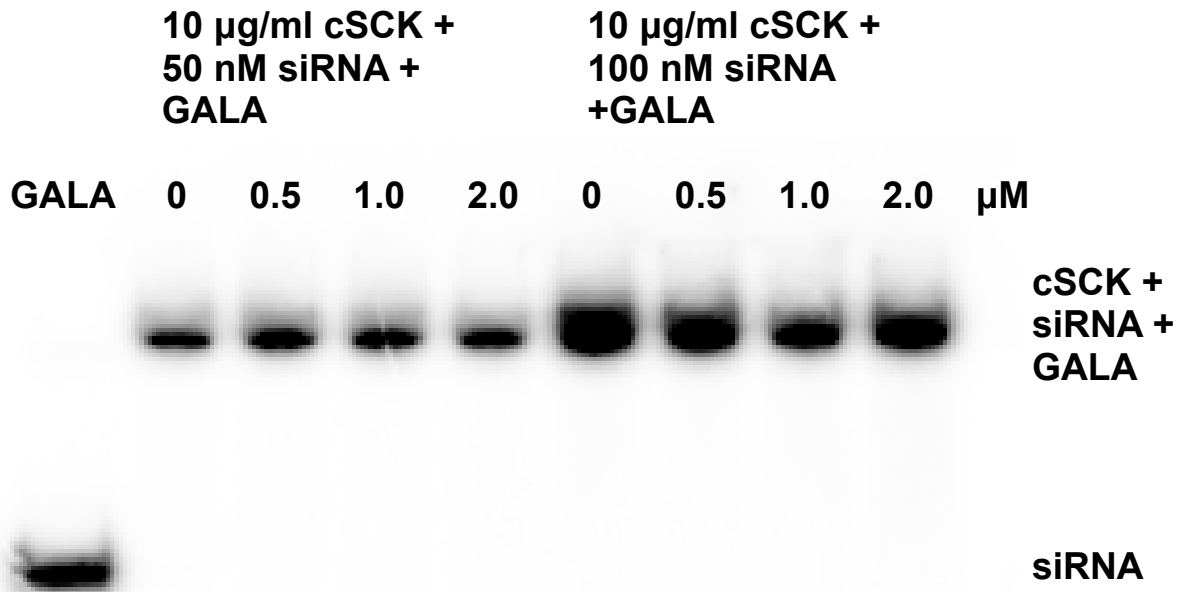

Figure S3. Electromobility shift assay of siRNA and GALA binding to PAEA<sub>160</sub>-b-PS<sub>30</sub> cSCK. <sup>32</sup>P-labeled iNOS siRNA (50 nM, 100 nM) and GALA (0, 0.5, 1.0, 2.0 µM) were incubated with cSCK (10 µg/ml) in OptiMEMI media for 30 min and electrophoresed on a 15% native polyamide gel.

A.

Alexa488-cSCK•iNOS-siRNA•GALA

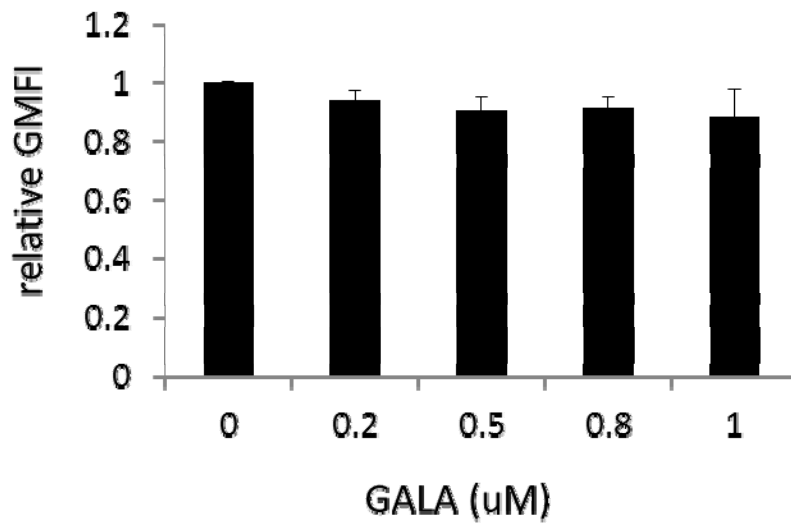

B.

cSCK•iNOS-siRNA•Cy5-GALA

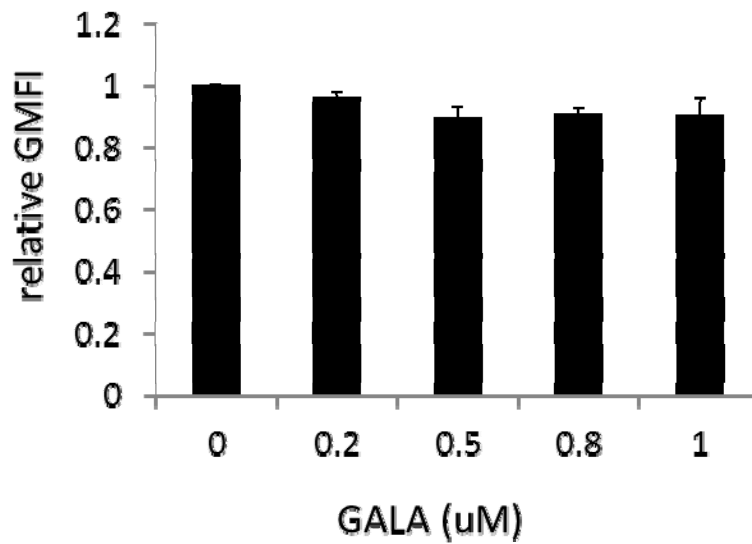

Figure S4. Cellular uptake of PAEA<sub>160</sub>-b-PS<sub>30</sub> cSCK(Alexa488)-siRNA(Cy5)-GALA nanocomplexes in RAW264.7 cell line by flow cytometry analysis. (A) Alexa488 channel (B) Cy5 channel.



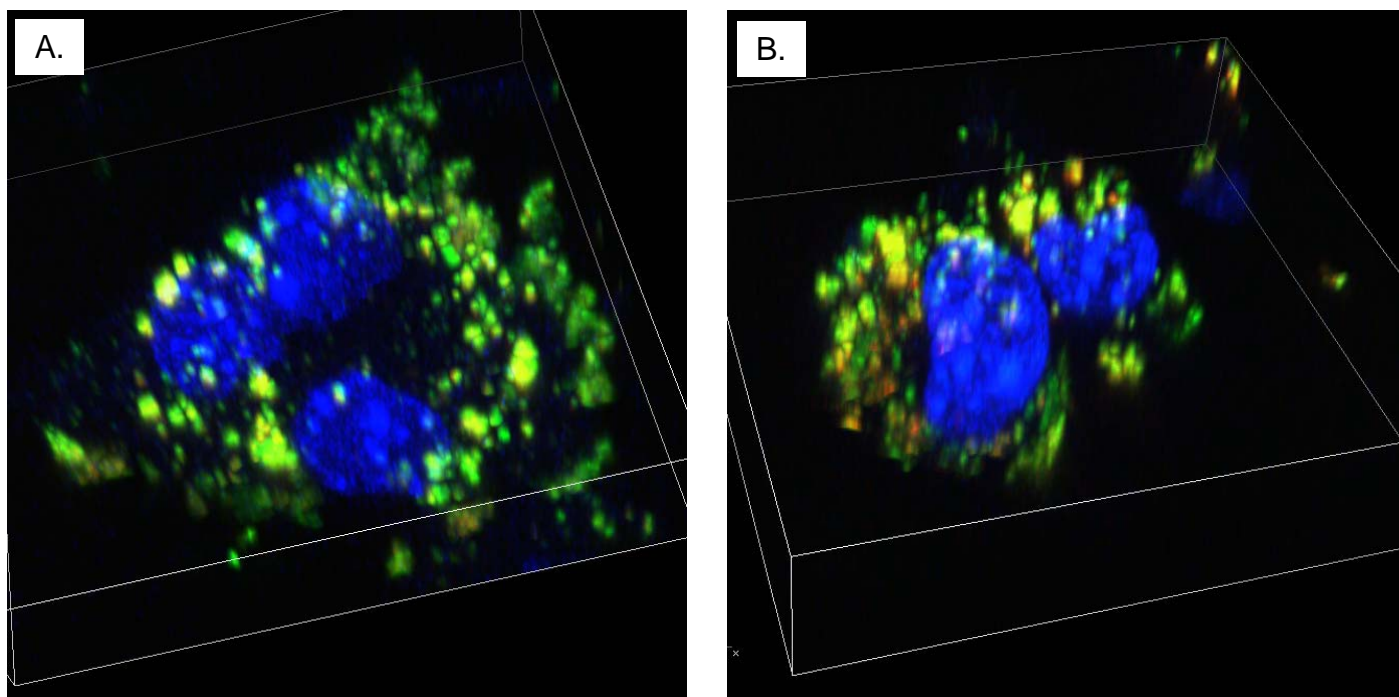

Figure S5. Representative confocal fluorescent microscopic image of intracellular localization of cSCK•siRNA•GALA nanocomplexes in RAW 264.7 cell line. cSCK-Alexafluor488 (green), siRNA-Cy5 (red), Nucleus (Blue). A complex of 10  $\mu\text{g}/\text{mL}$  cSCK and 50 nM siRNA A) without GALA and B) with 0.2  $\mu\text{M}$  GALA.

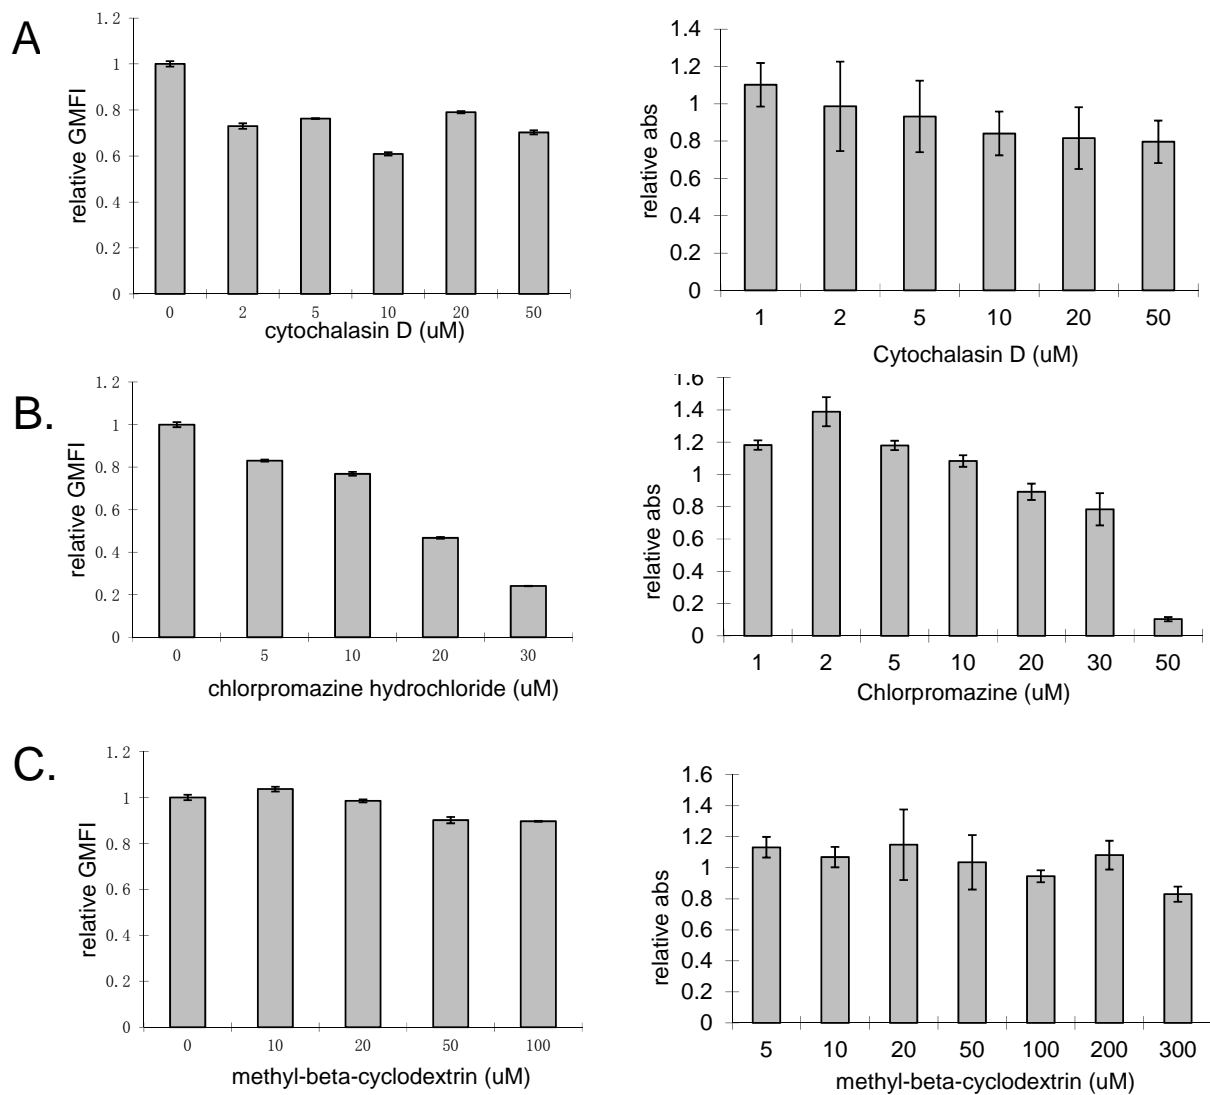

Figure S6. Inhibition of cSCK uptake and cytotoxicity of endocytosis inhibitors. RAW 264.7 cells were treated with the indicated inhibitors and incubated for 1 h after which cSCK uptake was monitored by flow cytometry and cell viability by the CellTiter 96 Non-Radioactive Cell proliferation Assay (MTT assay).

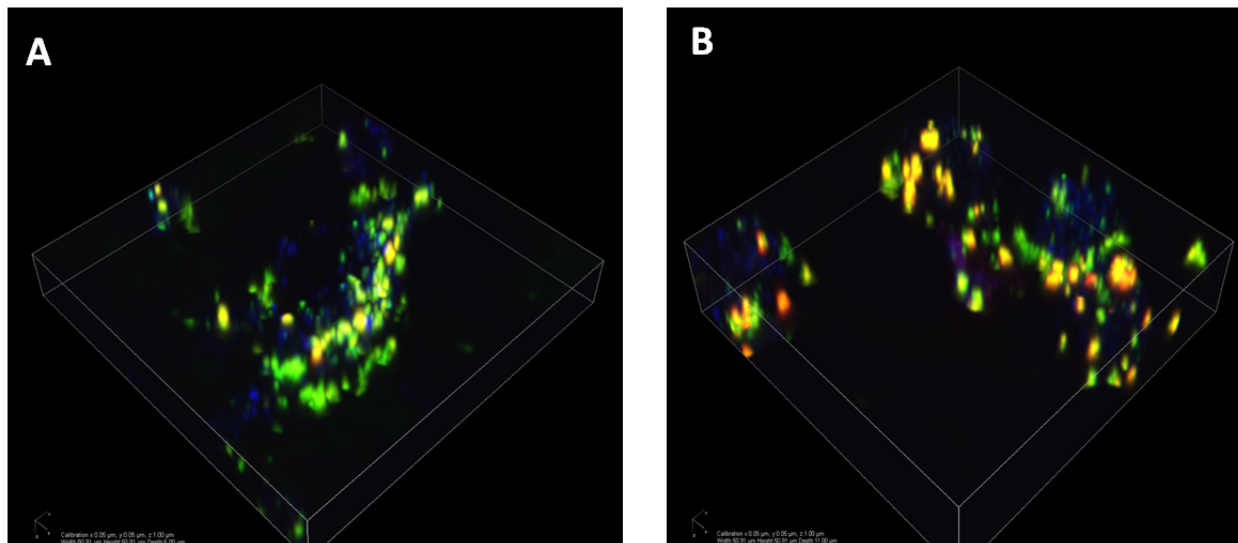

Figure S7. Representative confocal fluorescent microscopic image of intracellular localization of cSCK•siRNA•GALA nanocomplexes with Lysotracker-Blue in RAW 264.7 cell line. cSCK-Alexafluor488 (green), siRNA-Cy5 (red), Lysotracker-Blue (Blue). Lysotracker-Blue (50 nM) with complexes of 10 ug/mL cSCK and 50 nM siRNA without GALA (A) and with 0.2 uM GALA (B).

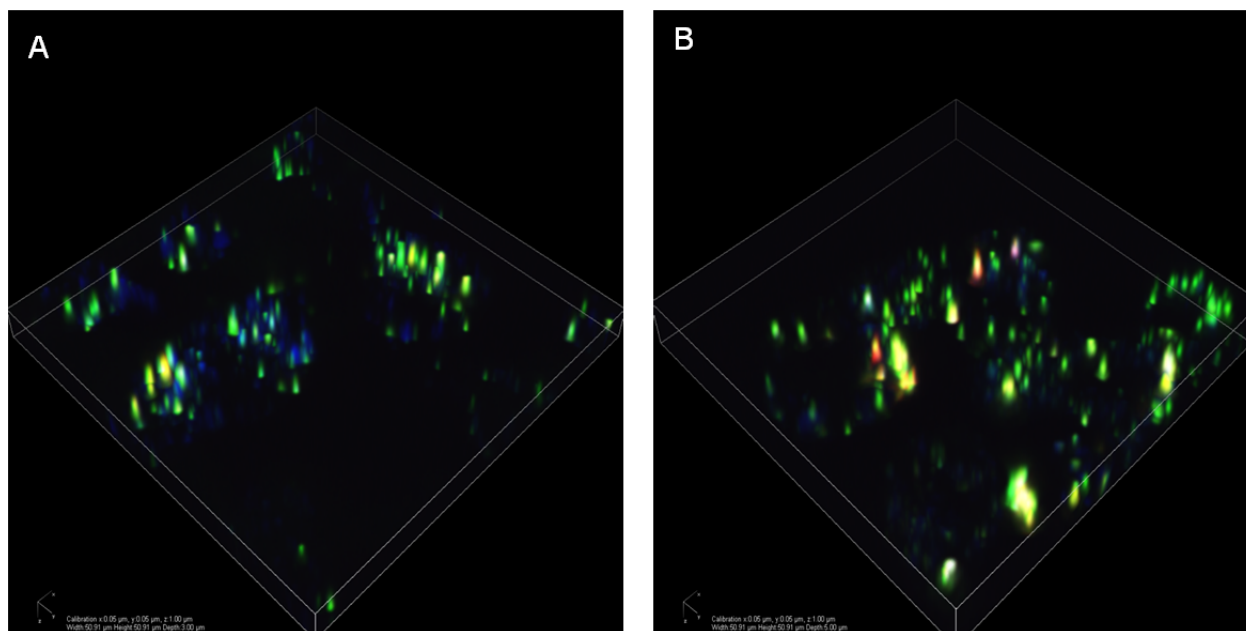

Figure S8. Representative confocal fluorescent microscopic image of intracellular localization of cSCK•siRNA•GALA nanocomplexes with Dextran in RAW 264.7 cell line. cSCK-Alexafluor488 (green), siRNA-Cy5 (red), Dextran-Cascade Blue (Blue). Dextran (100 ug/ml) with complexes of 10 ug/mL cSCK and 50 nM siRNA without GALA (A) and with 0.2 uM GALA (B).
